# Supplementary material for: Biomimetic strategies to produce catalytically reactive CuS nanodisks
Source: Royal Society of Chemistry journal article supplement (doi:10.1039/c9na00335e), 2019-01-01
Supplement: c9na00335e1.pdf [file c9na00335e1.pdf]

# Supporting Information

## Biomimetic Strategies to Produce Catalytically Reactive CuS Nanodisks

Elise C. Bell,<sup>1‡</sup> Catherine J. Munro,<sup>1‡</sup> Joseph M. Slocik,<sup>2</sup> Dharmendra Shukla,<sup>3</sup>  
Atul D. Parab,<sup>1</sup> Joshua L. Cohn,<sup>3</sup> and Marc R. Knecht<sup>1,4,\*</sup>

1. Department of Chemistry, University of Miami, 1301 Memorial Drive, Coral Gables, Florida 33146, United States
2. Air Force Research Laboratory, Wright-Patterson Air Force Base, Ohio 45433, United States
3. Department of Physics, University of Miami, 1320 Campo Sano Drive, Coral Gables, Florida 33146, United States
4. Dr. J. T. Macdonald Foundation Biomedical Nanotechnology Institute, University of Miami, UM Life Science Technology Building, 1951 NW 7th Ave, Suite 475, Miami, Florida 33136, United States

‡ Identifies equal contributions to the work.

\*E-mail Marc R. Knecht: [knecht@miami.edu](mailto:knecht@miami.edu)

### Table of Contents

|    |                                                       |    |
|----|-------------------------------------------------------|----|
| 1. | UV-Vis NIR of Other Amino Acid Materials              | S1 |
| 2. | Additional TEM and Histogram of as Prepared Materials | S2 |
| 3. | Additional TEM and Histogram of Dried Materials       | S3 |
| 4. | Dye Degradation Particle Free Control Spectra         | S4 |
| 5. | Neutral Red Degradation Spectra                       | S5 |
| 6. | Methyl Orange Degradation Spectra                     | S6 |
| 7. | Methylene Blue Degradation Spectra                    | S7 |

## 1. UV-vis NIR of Other Amino Acid Materials

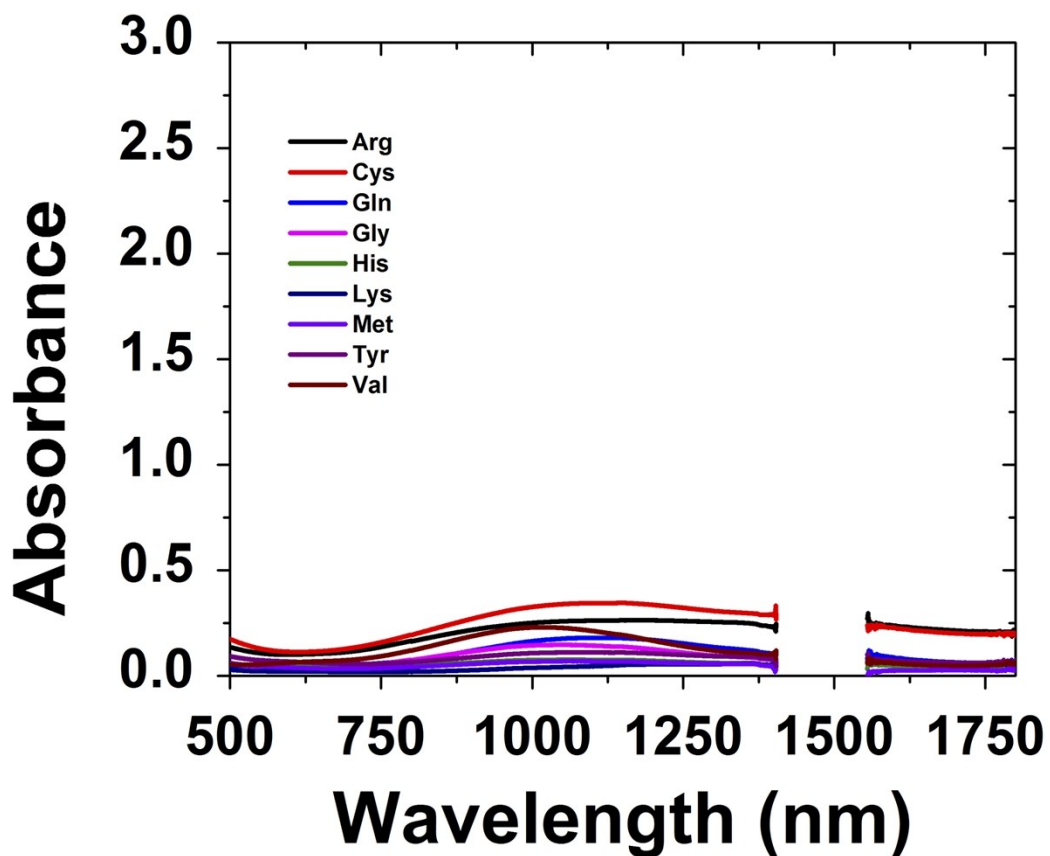

**Figure S1.** UV-vis NIR spectra of CuS materials prepared in the presence of the indicated amino acids 24 h after the addition of  $\text{Na}_2\text{S}$ . Note that the data between 1350 and 1650 nm is not included due to the strong absorbance of water within this window.

## 2. Additional TEM and Histogram of as Prepared Materials

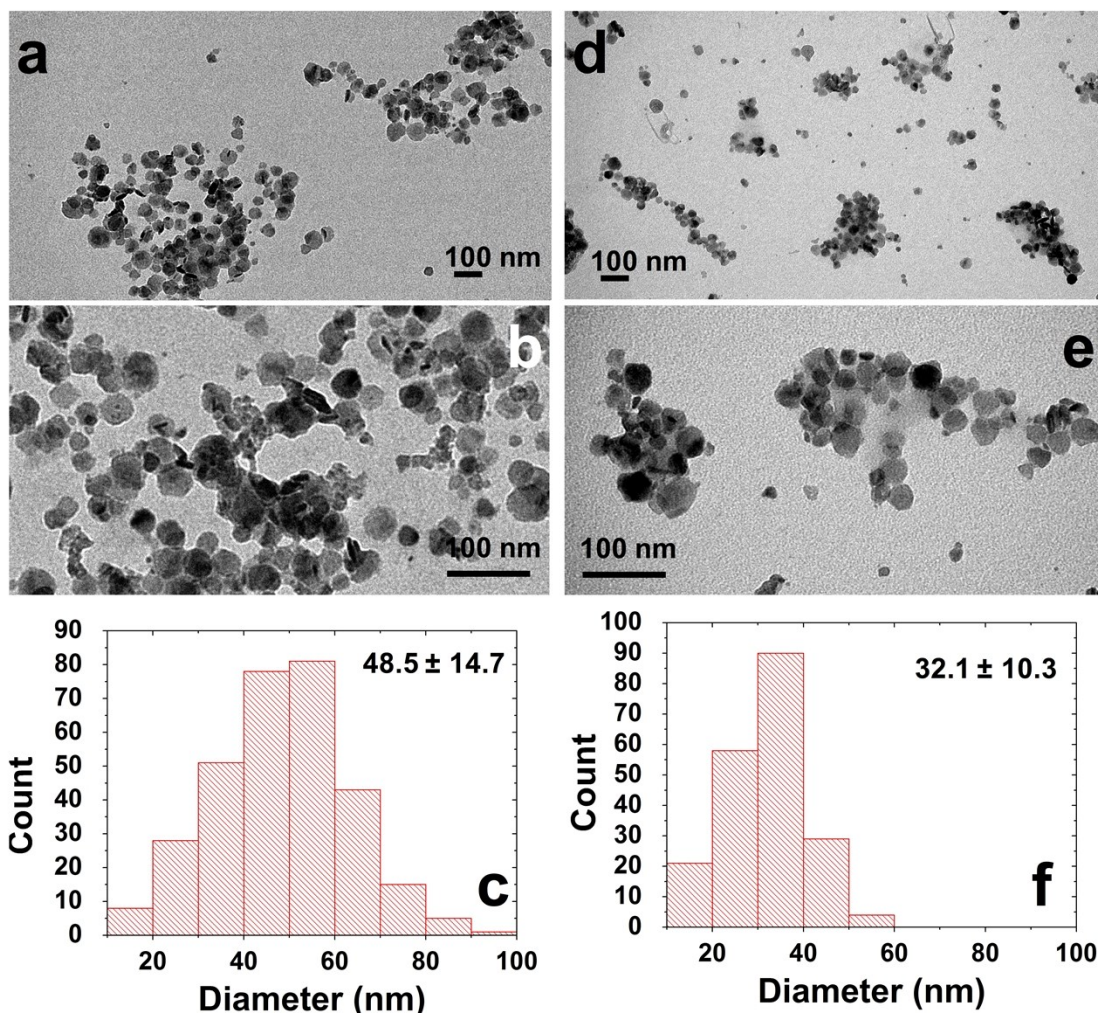

**Figure S2.** TEM and particle size histograms of the as prepared (a-c) Asp- and (d-f) Glu-stabilized CuS materials.

### 3. Additional TEM and Histogram of Lyophilized Materials

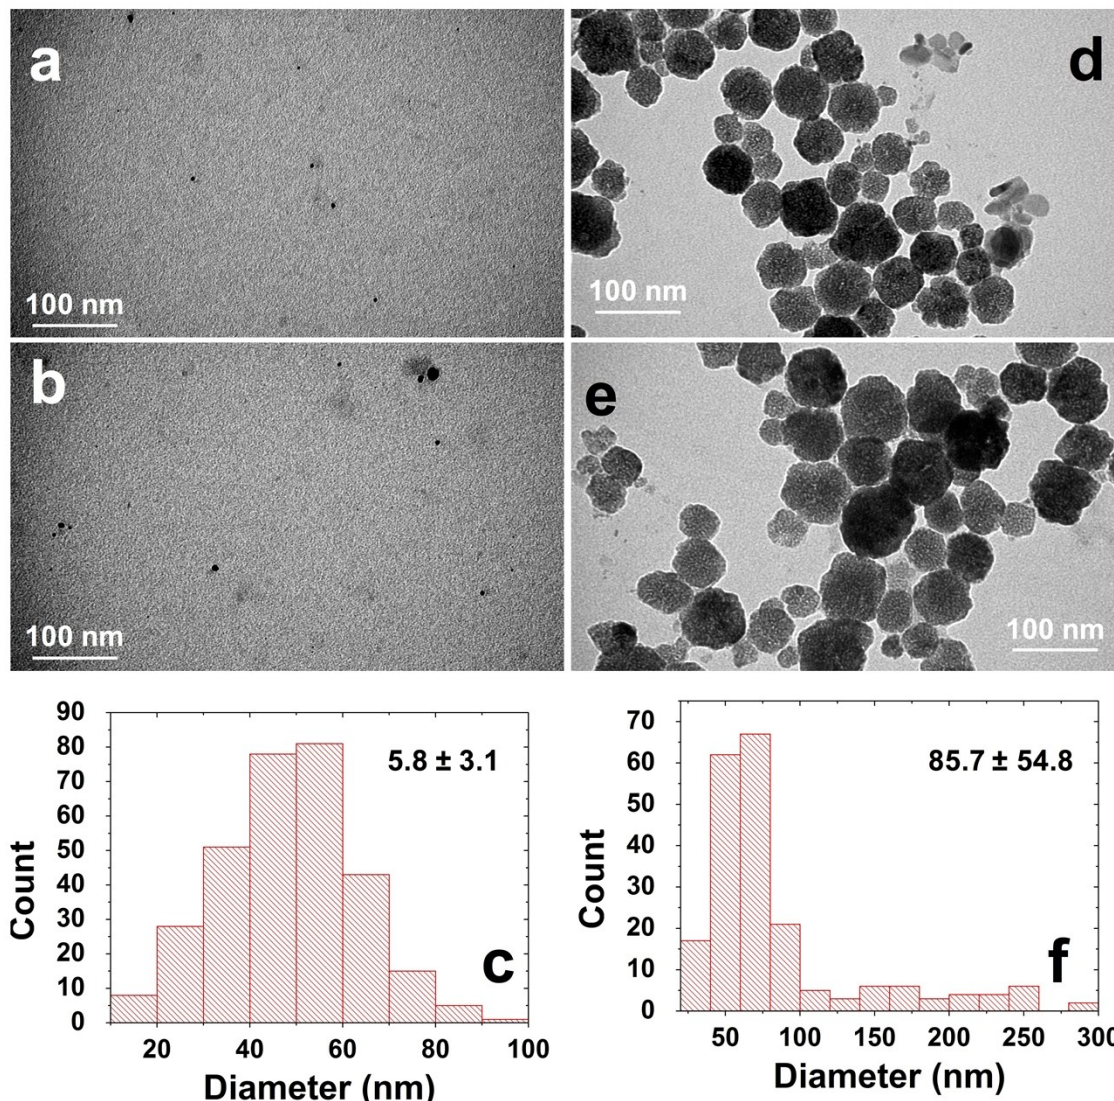

**Figure S3.** TEM and particle size histograms of the lyophilized (a-c) Asp- and (d-f) Glu-stabilized CuS materials.

#### 4. Dye Degradation Particle Free Control Spectra

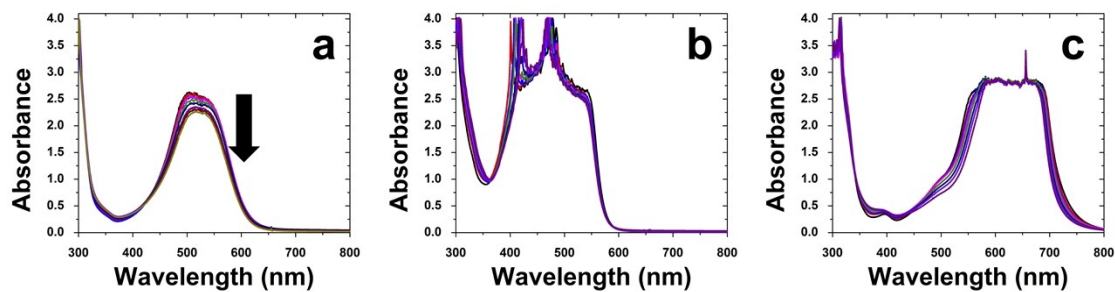

**Figure S4.** Control analysis for the degradation of (a) neutral red, (b) methyl orange, and (c) methylene blue in the absence of the CuS nanoparticles. Such results confirm negligible degradation due to the presence of  $\text{H}_2\text{O}_2$  without the catalytic materials.



## 5. Neutral Red Degradation Spectra

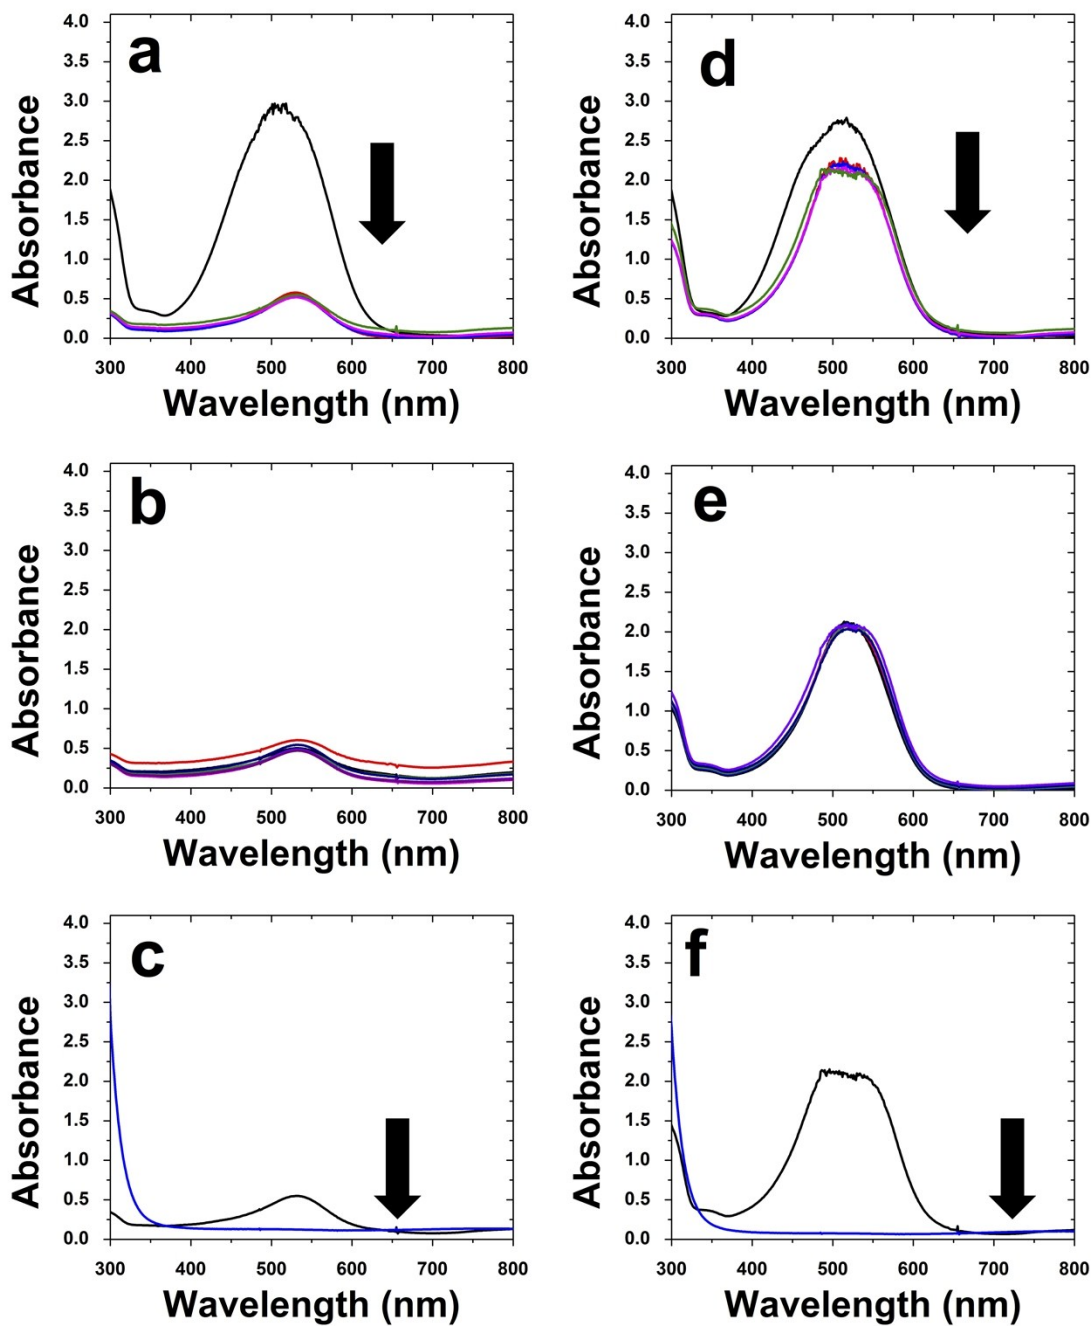

**Figure S5.** UV-vis analysis of (a) adsorption of neutral red on Asp-passivated CuS, (b) photo-driven degradation of neutral red by Asp-capped CuS in the absence of  $H_2O_2$  demonstrating negligible degradation, and (c) photo-driven advanced oxidation of neutral red by Asp-stabilized CuS in the presence of  $H_2O_2$ , parts (d-f) present the same analysis as parts (a-c); however, Glu-passivated CuS was used for all analyses.

## 6. Methyl Orange Degradation Spectra

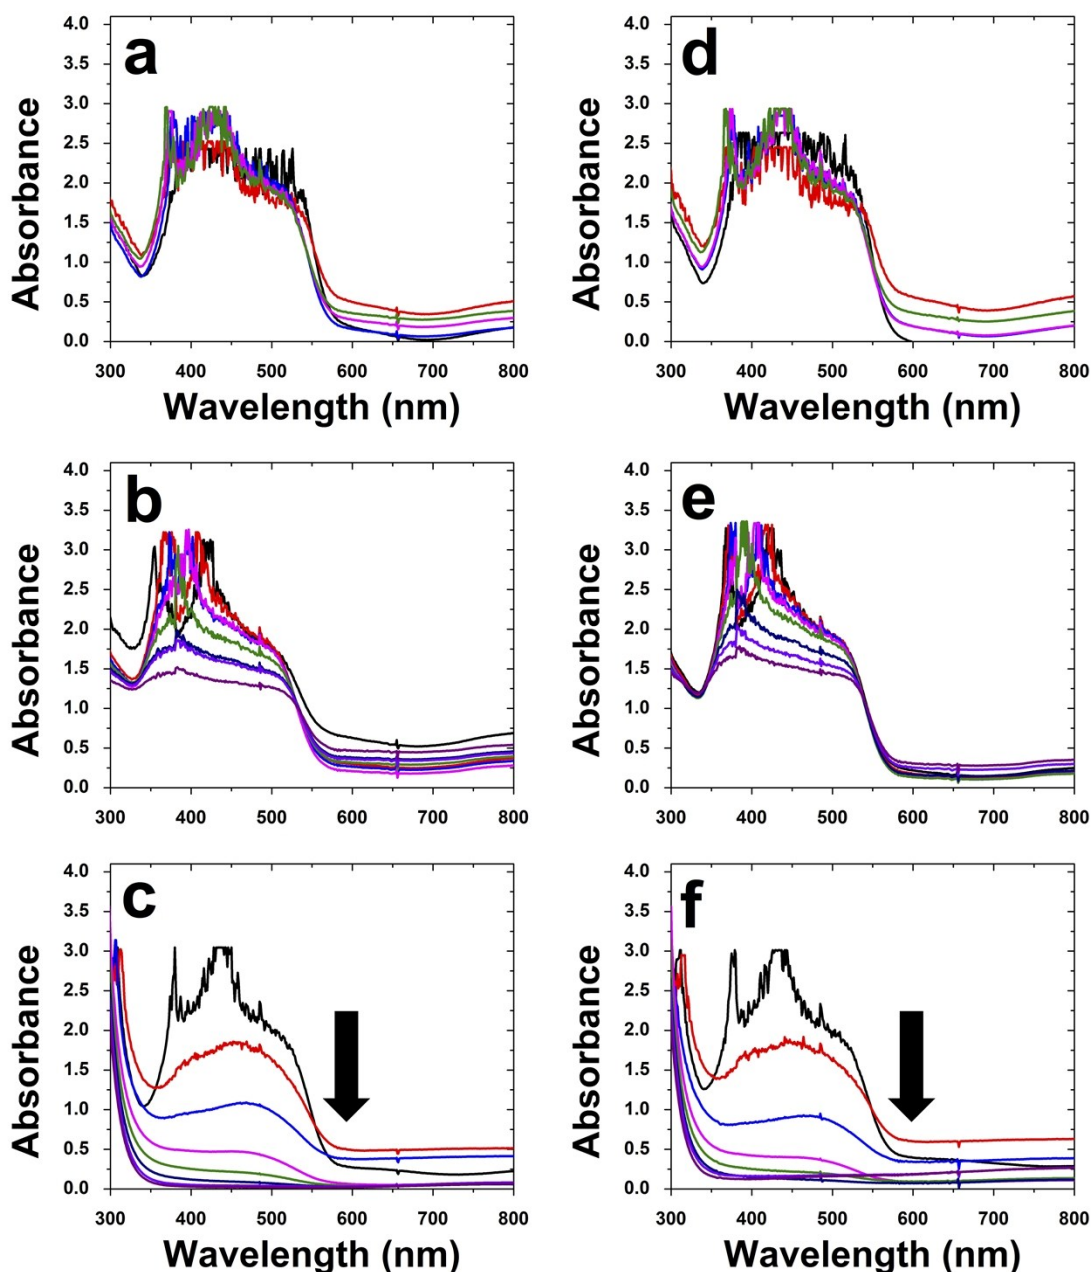

**Figure S6.** UV-vis analysis of (a) adsorption of methyl orange on Asp-passivated CuS, (b) photo-driven degradation of methyl orange by Asp-capped CuS in the absence of  $\text{H}_2\text{O}_2$  demonstrating negligible degradation, and (c) photo-driven advanced oxidation of methyl orange by Asp-stabilized CuS in the presence of  $\text{H}_2\text{O}_2$ , parts (d-f) present the same analysis as parts (a-c); however, Glu-passivated CuS was used for all analyses.

## 7. Methylene Blue Degradation Spectra

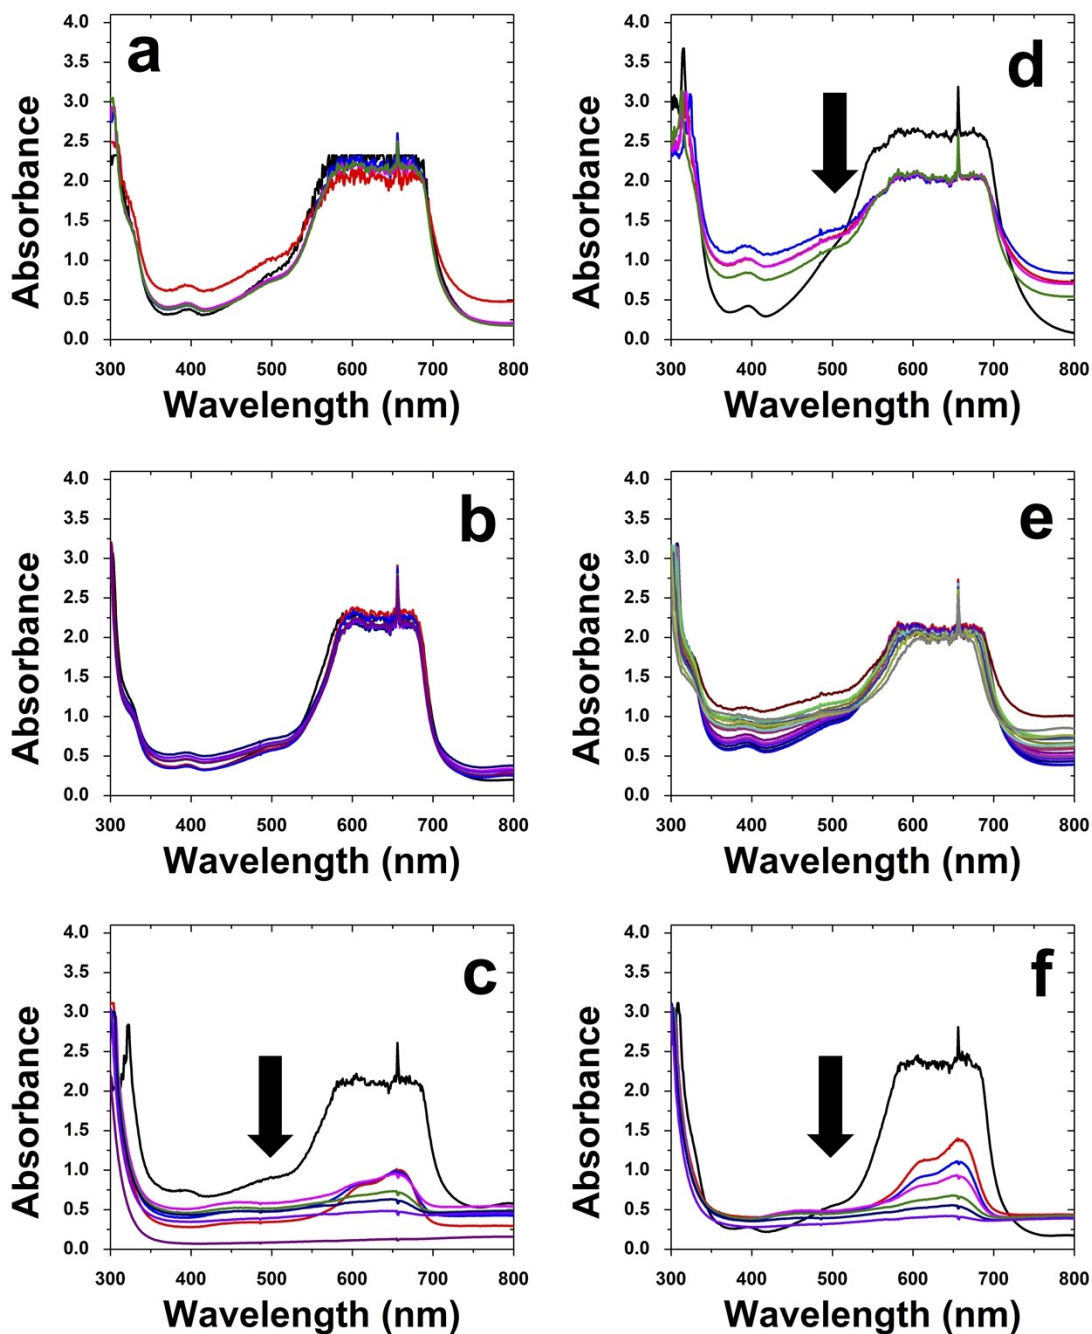

**Figure S7.** UV-vis analysis of (a) adsorption of methylene blue on Asp-passivated CuS, (b) photo-driven degradation of methylene blue by Asp-capped CuS in the absence of  $\text{H}_2\text{O}_2$  demonstrating negligible degradation, and (c) photo-driven advanced oxidation of methylene blue by Asp-stabilized CuS in the presence of  $\text{H}_2\text{O}_2$ , parts (d-f) present the same analysis as parts (a-c); however, Glu-passivated CuS was used for all analyses.
